# Supplementary material for: Ecology of West Nile virus across four European countries: empirical modelling of the Culex pipiens abundance dynamics as a function of weather
Source: PubMed Central journal article supplement (PMC5657042; doi:10.1186/s13071-017-2484-y), 2017-10-26
Supplement: 13071_2017_2484_MOESM1_ESM.pdf [file 13071_2017_2484_MOESM1_ESM.pdf]

1 **Additional file 1**

2  
3 **Ecology of West Nile virus across four European countries: empirical modelling of the *Culex pipiens* abundance dynamics as a function of weather**

---

4 Thomas A. Groen<sup>1</sup>, Gregory L'Amber<sup>2</sup>, Romeo Bellini<sup>3</sup>, Alexandra Chaskopoulou<sup>4</sup>, Dusan Petric<sup>5</sup>, Marija Zgomba<sup>5</sup>, Laurence Marrama<sup>6</sup> and Dominique J.  
5 Bicout<sup>7,8</sup>

6  
7 <sup>1</sup>University of Twente, Faculty of Geo-Information Science and Earth Observation, PO Box 217, 7500 AE, Enschede, the Netherlands

8 <sup>2</sup>EID Mediterranee, 165 Avenue Paul Rimbaud, 34184 Montpellier, France

9 <sup>3</sup>Centro Agricoltura Ambiente "G. Nicoli", Via Argini Nord 3351, 40014 Crevalcore, Italy

10 <sup>4</sup>USDA-ARS, European Biological Control Laboratory, Tsimiski 43, 54623 Thessaloniki, Greece

11 <sup>5</sup>University of Novi Sad, Faculty of Agriculture, Laboratory for Medical Entomology, Trg D. Obradovica 8, 21000 Novi Sad, Serbia

12 <sup>6</sup>ECDC, European Centre for Disease Prevention and Control, Tomtebodavagen 11A, 17183 Stockholm, Sweden

13 <sup>7</sup>Biomathematics and Epidemiology EPSP-TIMC, VetAgro Sup, Veterinary Campus of Lyon, F – 69280 Marcy l'Etoile, France

14 <sup>8</sup>Laue – Langevin Institute, Theory Group, F – 38042 Grenoble cedex 9, France

15  
16 **Correspondence:** [bicout@ill.fr](mailto:bicout@ill.fr); [dominique.bicout@vetagro-sup.fr](mailto:dominique.bicout@vetagro-sup.fr)

19

20 **Table S1:** AIC scores for the different models

|                | Linear model with<br>Temperature | (S)ARIMA | (S)ARIMA +<br>Temperature | (S)ARIMA +<br>Precipitation | (S)ARIMA +<br>Relative Humidity | (S)ARIMA +<br>Temperature and<br>Precipitation | (S)ARIMA +<br>Temperature and<br>Relative humidity | (S)ARIMA +<br>Precipitation and<br>Relative humidity | (S)ARIMA +<br>Temperature,<br>Precipitation and<br>Relative humidity |
|----------------|----------------------------------|----------|---------------------------|-----------------------------|---------------------------------|------------------------------------------------|----------------------------------------------------|------------------------------------------------------|----------------------------------------------------------------------|
| Camargue       | -299.4                           | -378.6   | -369.7                    | -373.8                      | NA                              | 367.7                                          | NA                                                 | NA                                                   | NA                                                                   |
| Evros          | -137.3                           | -178.6   | -178.7                    | -172.1                      | -166.0                          | -180.4                                         | -178.7                                             | -164.1                                               | -176.7                                                               |
| Thessaloniki   | -474.9                           | -670.5   | -660.3                    | -638.5                      | -655.6                          | -661.4                                         | -255.2                                             | -640.2                                               | -648.3                                                               |
| Emilia Romagna | -851.1                           | -1182.2  | -1125.8                   | -1122.7                     | -1126.8                         | -1123.8                                        | -1128.5                                            | -1124.8                                              | -1126.5                                                              |
| Po Delta       | -1319.8                          | -1838.3  | -1792.4                   | -1786.8                     | 1786.7                          | -1790.7                                        | -1790.5                                            | -1785.2                                              | -1788.8                                                              |
| Serbia         | -1203.7                          | -1631.7  | -1574.5                   | -1577.9                     | -1576.2                         | -1577.4                                        | -1576.3                                            | -1578.1                                              | -1579.8                                                              |

21

22

23 **Table S2:** MAE scores for the different models

|                | Linear model with<br>Temperature | (S)ARIMA<br>(S)ARIMA | (S)ARIMA +<br>Temperature | (S)ARIMA +<br>Precipitation | (S)ARIMA +<br>Relative Humidity | (S)ARIMA +<br>Temperature and<br>Precipitation | (S)ARIMA +<br>Temperature and<br>Relative humidity | (S)ARIMA +<br>Precipitation and<br>Relative humidity | (S)ARIMA +<br>Temperature,<br>Precipitation and<br>Relative humidity |
|----------------|----------------------------------|----------------------|---------------------------|-----------------------------|---------------------------------|------------------------------------------------|----------------------------------------------------|------------------------------------------------------|----------------------------------------------------------------------|
| Camargue       | 0.076                            | 0.086                | 0.086                     | 0.086                       | NA                              | 0.086                                          | NA                                                 | NA                                                   | NA                                                                   |
| Evros          | 0.068                            | 0.086                | 0.088                     | 0.086                       | 0.091                           | 0.087                                          | 0.088                                              | 0.091                                                | 0.088                                                                |
| Thessaloniki   | 0.048                            | 0.050                | 0.049                     | 0.050                       | 0.048                           | 0.050                                          | 0.053                                              | 0.050                                                | 0.052                                                                |
| Emilia Romagna | 0.037                            | 0.038                | 0.035                     | 0.034                       | 0.034                           | 0.035                                          | 0.035                                              | 0.034                                                | 0.035                                                                |
| Po Delta       | 0.041                            | 0.039                | 0.035                     | 0.035                       | 0.035                           | 0.035                                          | 0.035                                              | 0.035                                                | 0.035                                                                |
| Serbia         | 0.038                            | 0.029                | 0.029                     | 0.028                       | 0.029                           | 0.029                                          | 0.029                                              | 0.028                                                | 0.029                                                                |

24

25

26 **Figure S1:** correlations between weather variables per functional unit (FU)

27 **France: Camargue**

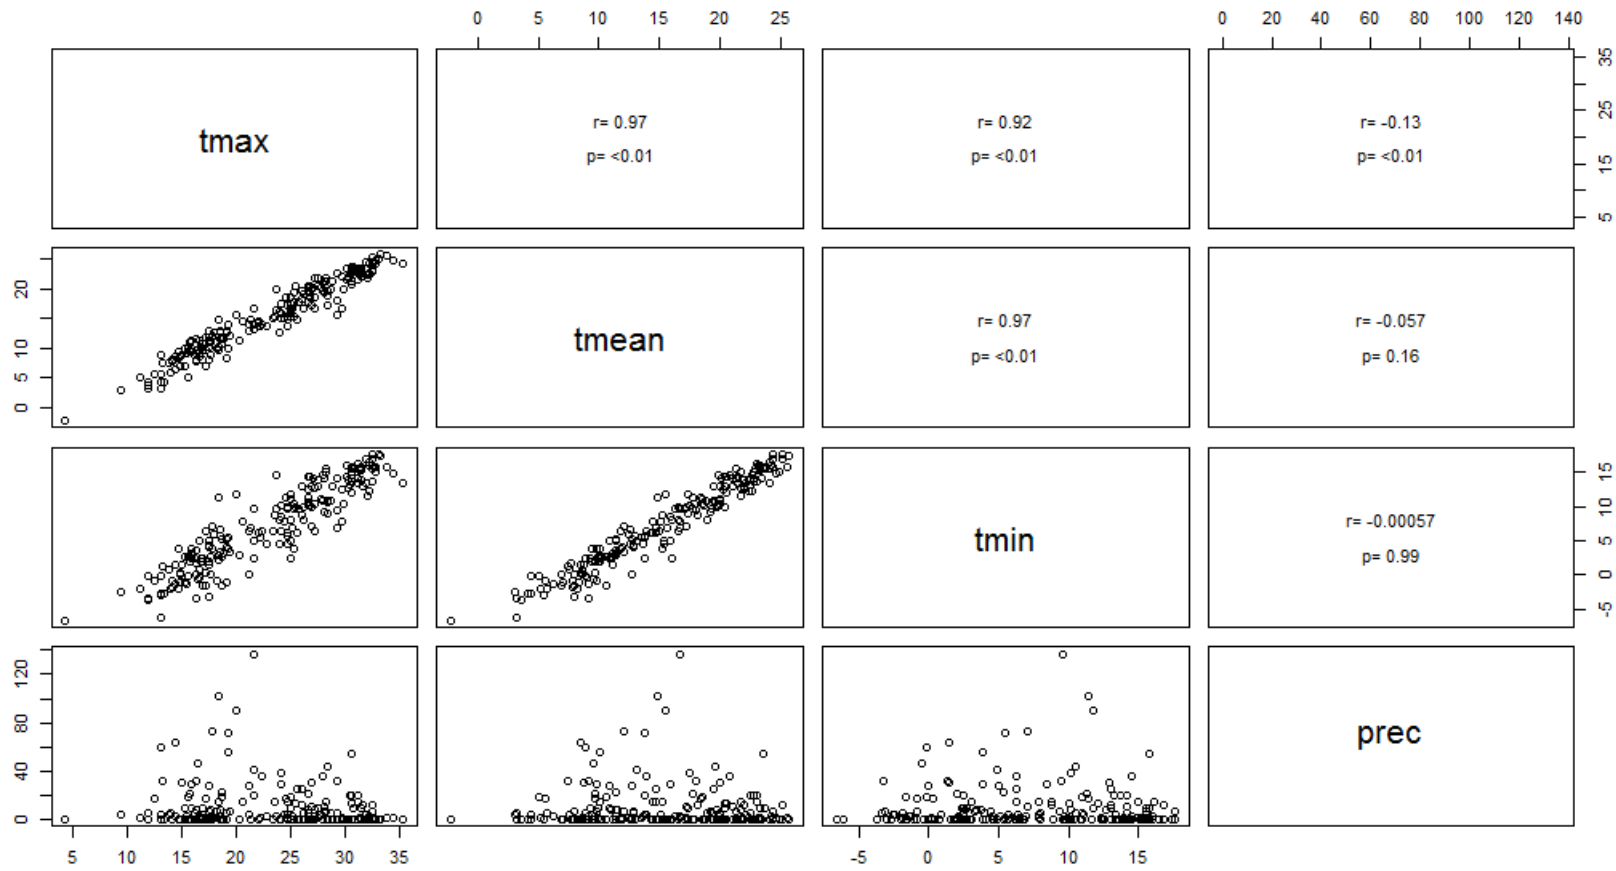

28

29 Greece: Evros

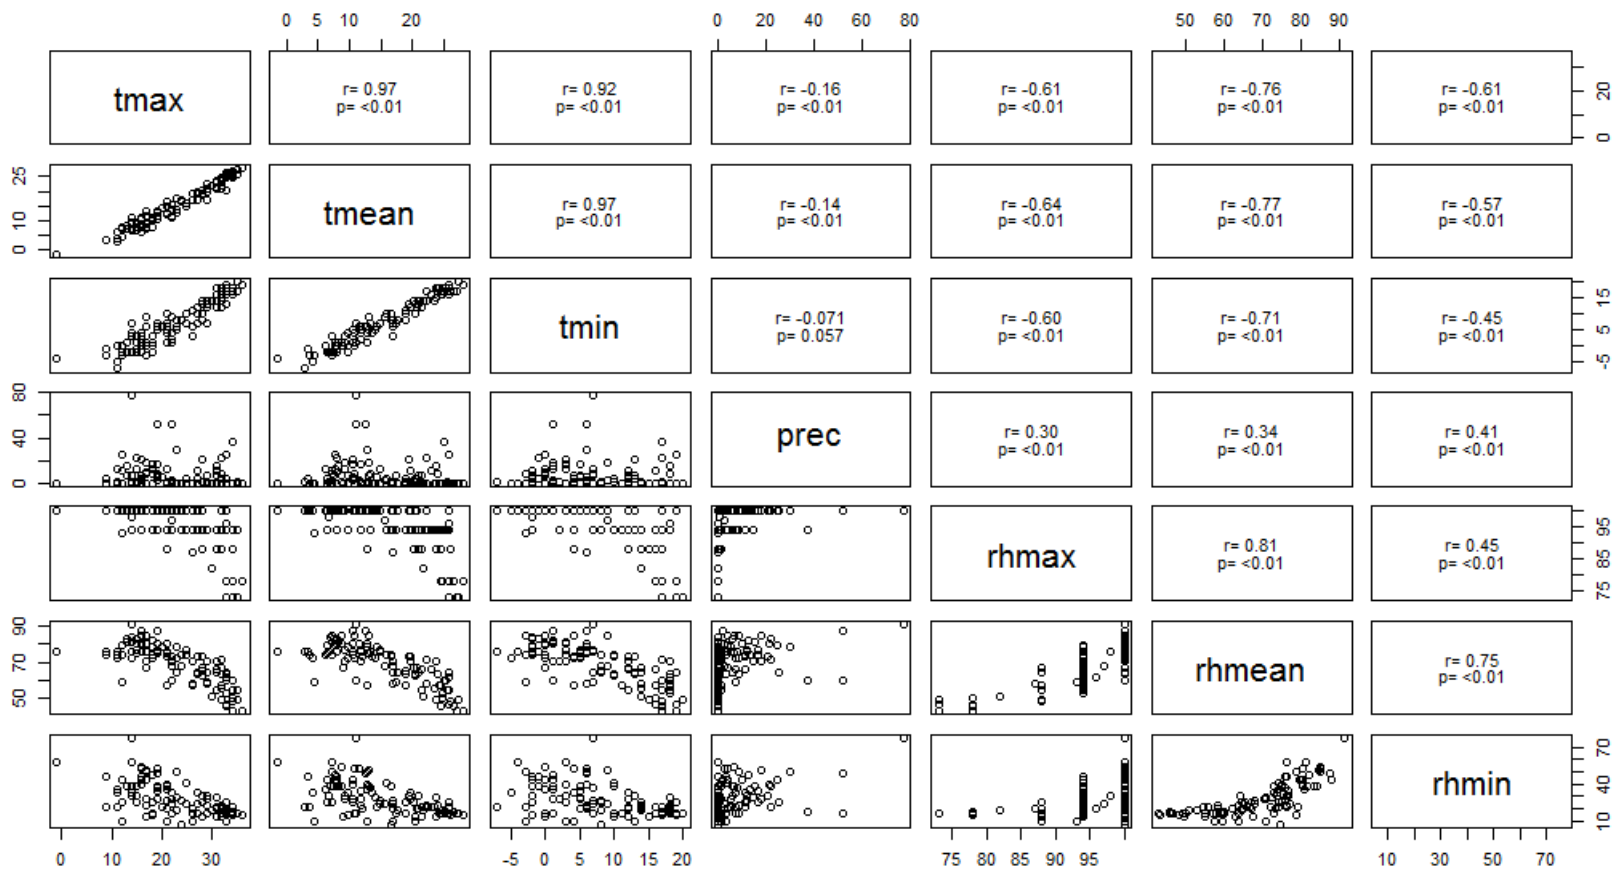

30

31 Greece: Thessaloniki

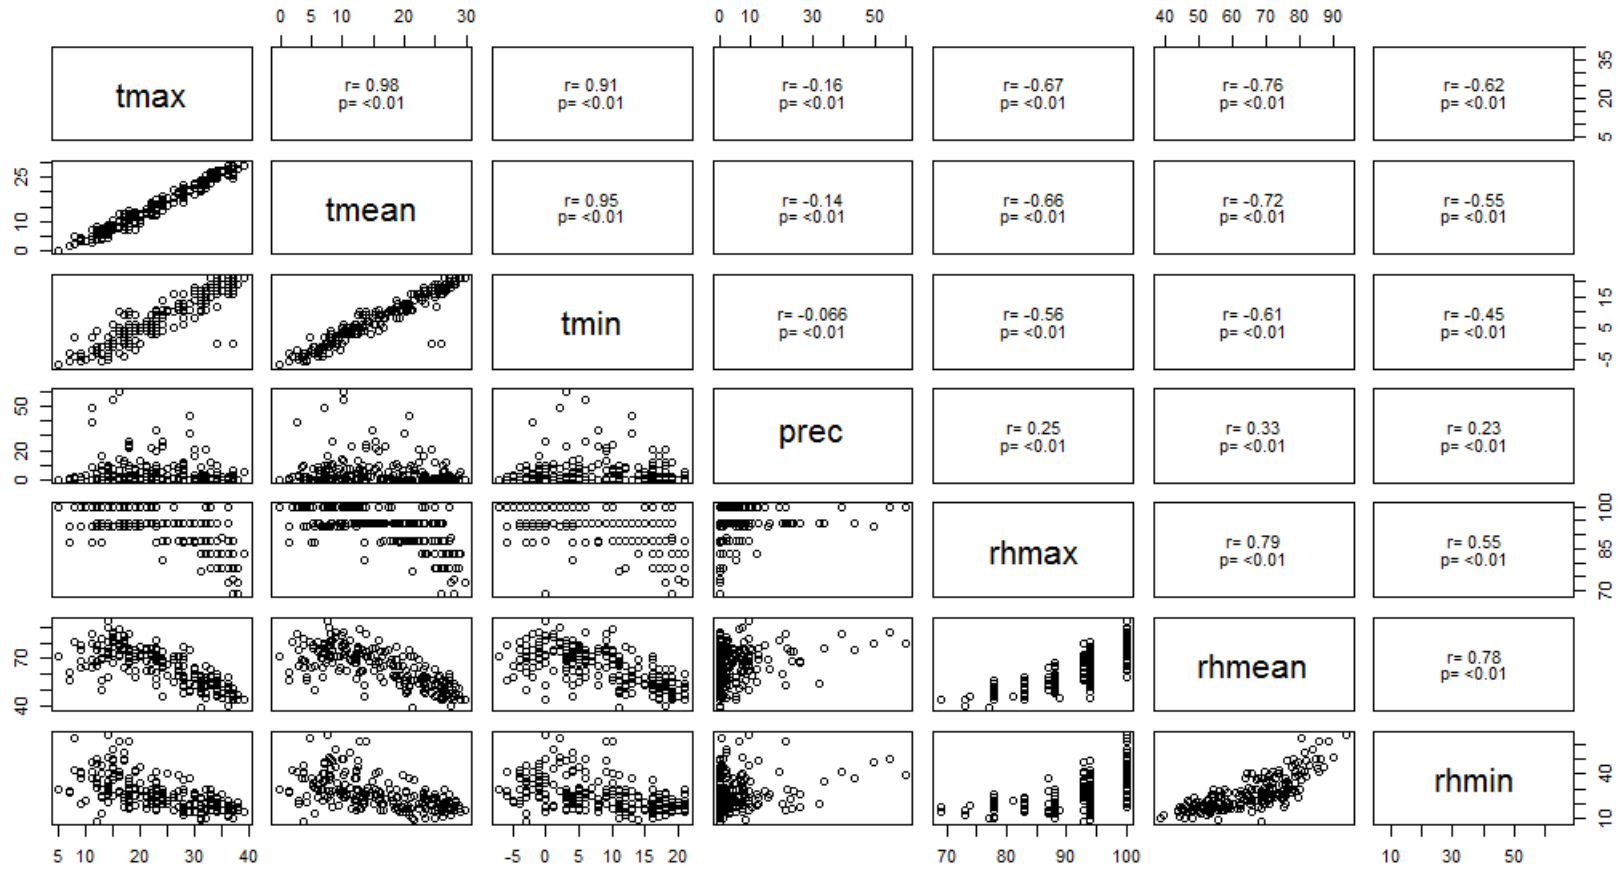

32

33 Italy: Emilia Romagna

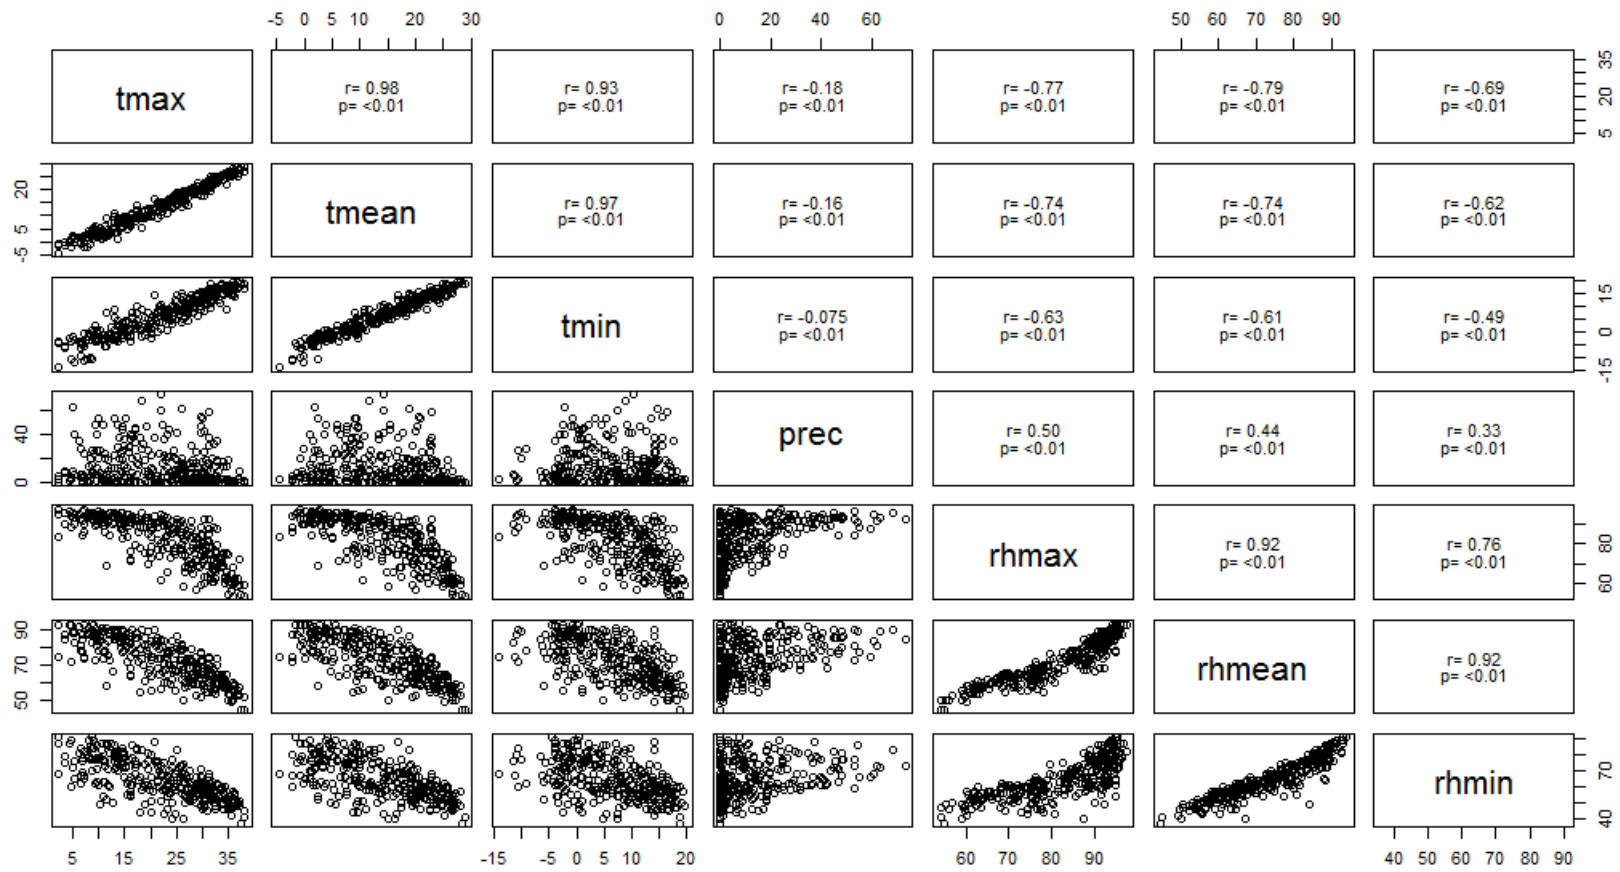

35 Italy: Po Delta

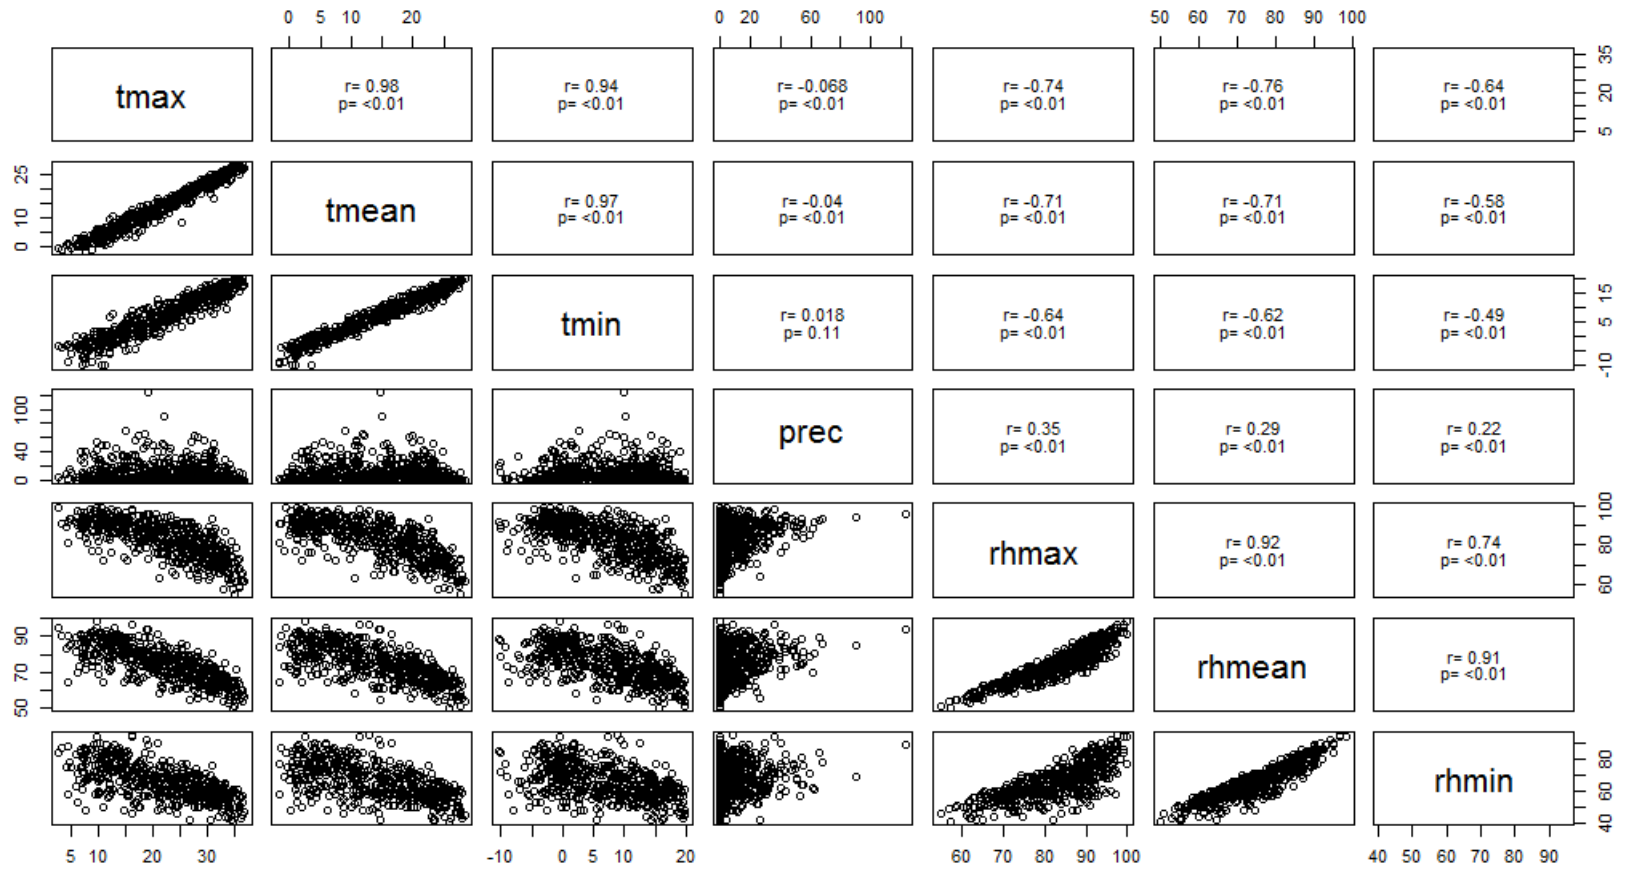

36

37



38 Serbia: Novi Sad and surroundings

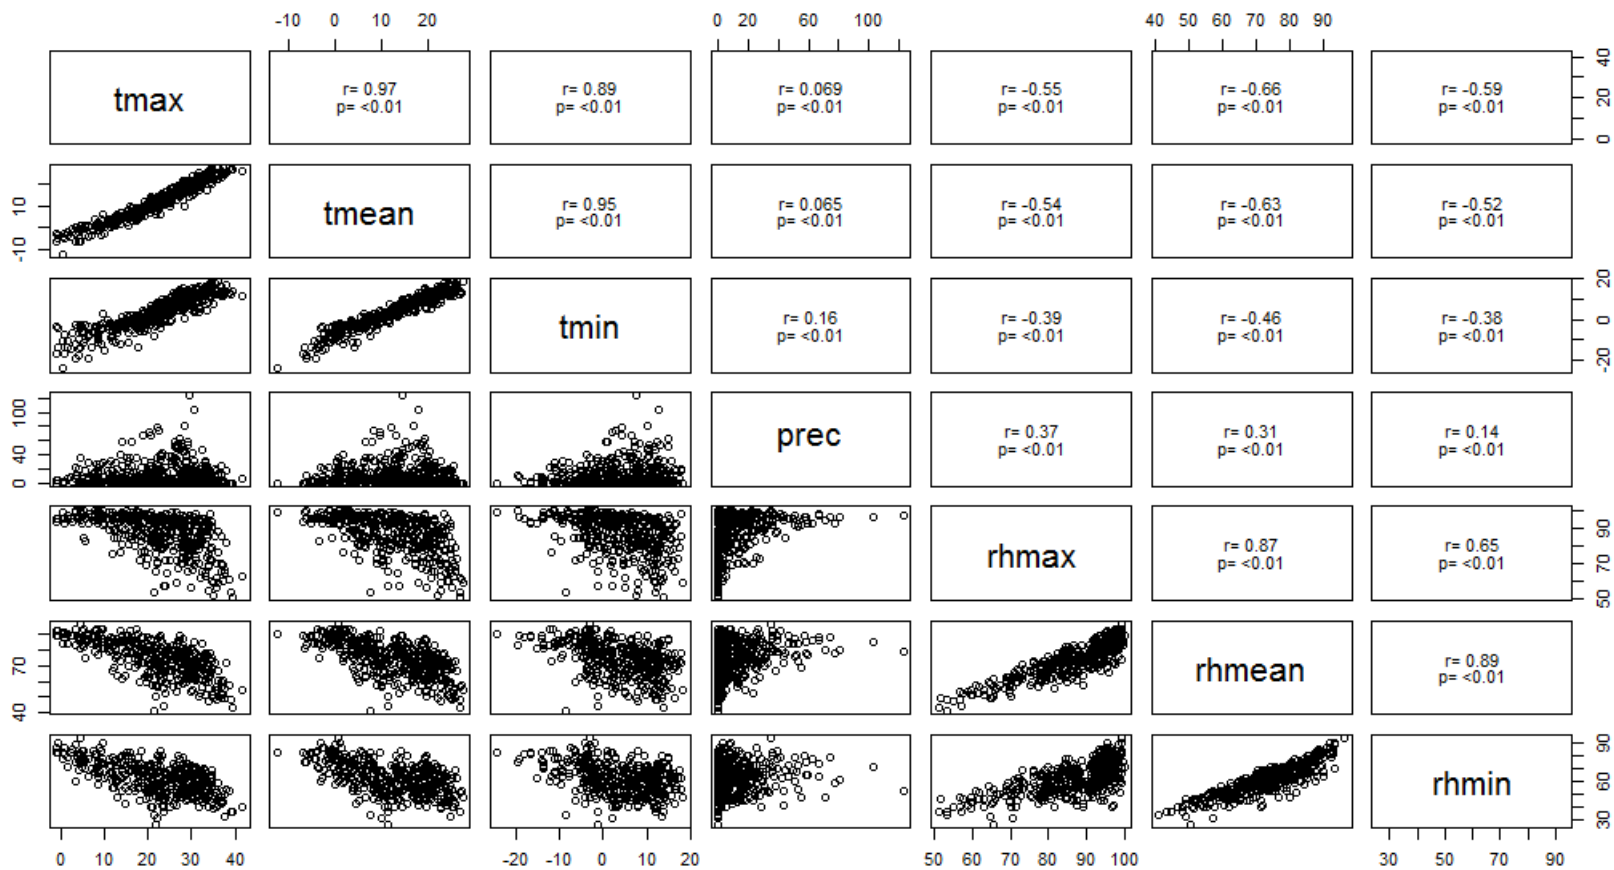

39
